# Supplementary material
Source: Springer Nature journal article supplement (https://www.springermedizin.de/resource/supplementary/13012_2011_438_MOESM2_ESM.pdf/9629764)

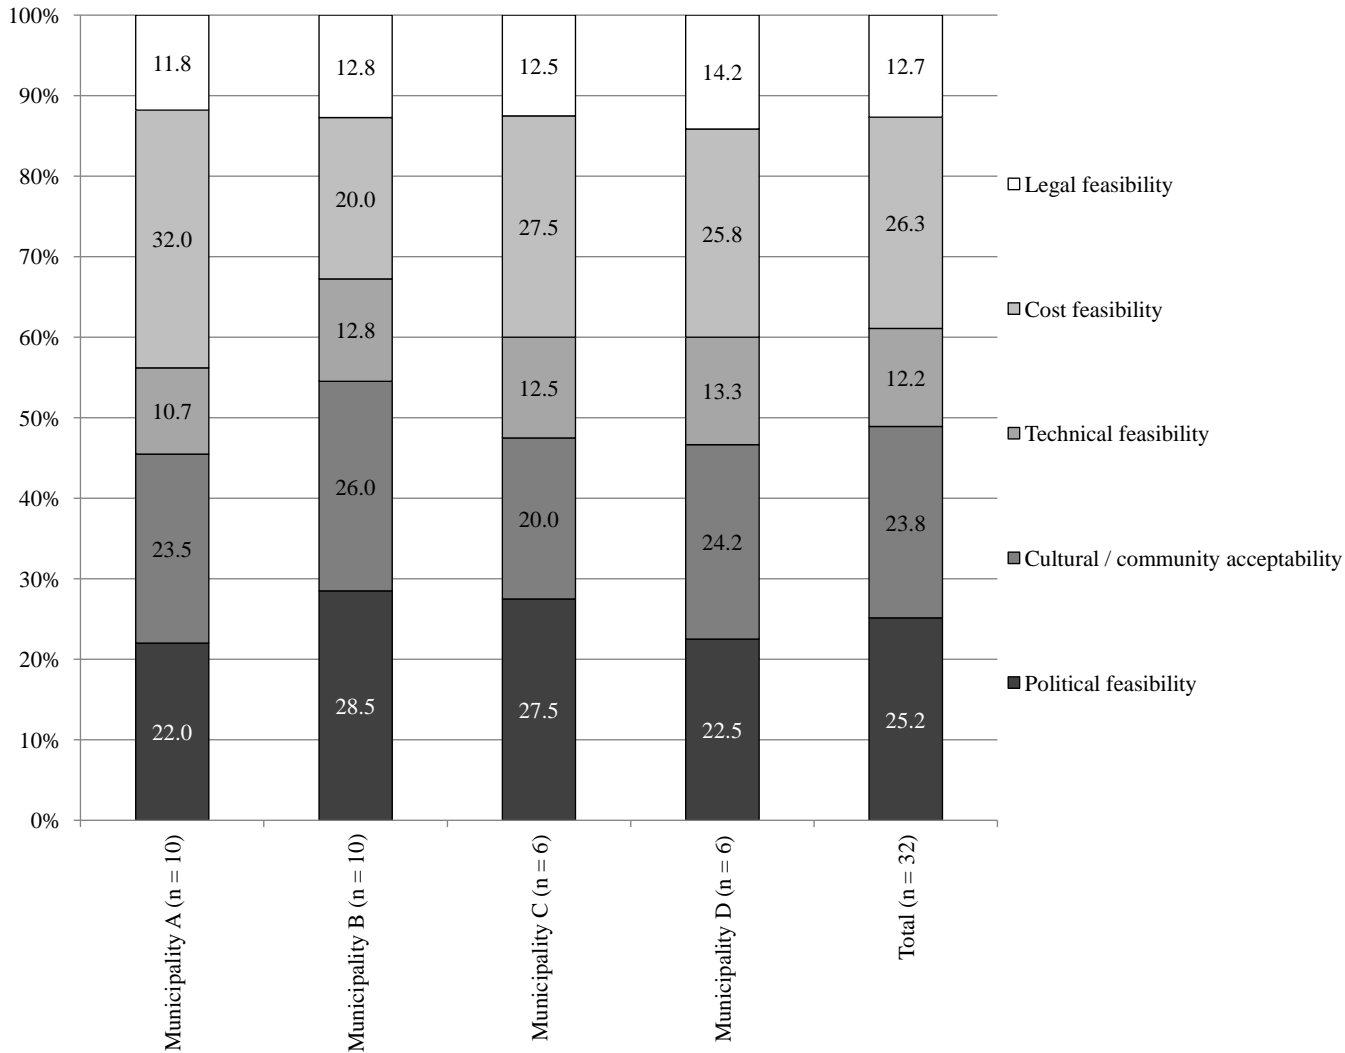

Supplement: MOESM2 [file 9629764]
